# Supplementary material for: A Novel and Efficient High-Yield Method for Preparing Bacterial Ghosts
Source: MDPI journal article supplement (doi:10.3390/toxins13060420), 2021-06-13
Supplement: s1 [file s1]

# Supplementary Materials: A Novel High-Efficient Method for Preparing Bacterial Ghosts in Large Quantities

Yi Ma, Liu Cui, Meng Wang, Qiuli Sun, Kaisheng Liu and Jufang Wang

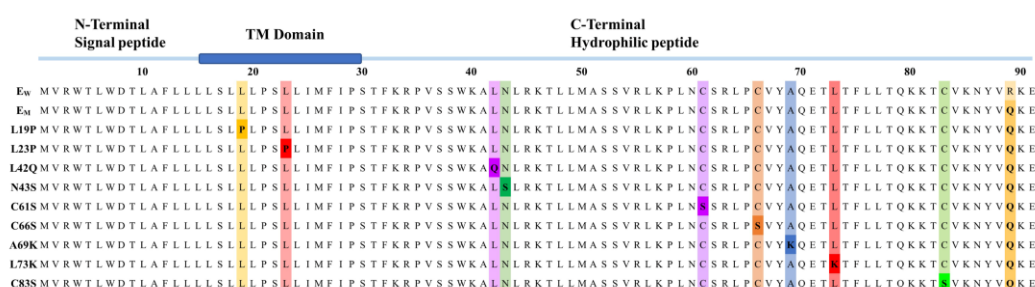

**Figure S1.** Alignment of lysis protein E and its mutants were listed. Ew referred to wild-type lyase, and Em was the mutation of arginine at position 89 to glutamine. The mutation sites were marked in color. Transmembrane domain (TM Domain) from the 15th to 30th was labeled.

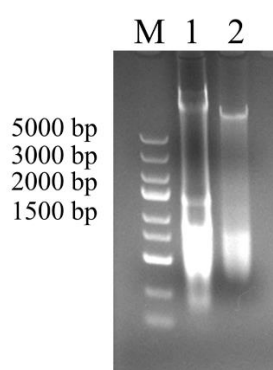

**Figure S2.** The genomic DNA in *E. coli* BL21 (DE3) before lysis (lane 1) and after lysis (lane 2) were analyzed by gel electrophoresis.

**Table S1.** Part of the primers used in this study.

| Primers              | Sequence (5'–3')                                    |
|----------------------|-----------------------------------------------------|
| F-EW                 | TTTAAGAAGGAGATATACCATGGATGGTACGCTGGACTTTGTGG        |
| R-EW                 | CGGATCTCAGTGGTGGTGGTGGTGGTGGTCTTTCTGGACATAATTCTTC   |
| F-EM                 | TTTAAGAAGGAGATATACCATGG ATGGTGC GTTGGACTTTATGG      |
| R-EM                 | CGGATCTCAGTGGTGGTGGTGGTGGTGGTCTTTCTGGACATAATTCTTCAC |
| F <sub>M</sub> /L19P | TTAGTCTGCCATTGCCATCATTGTTAATTATGTTTCATCCCGAGCAC     |
| R <sub>M</sub> /L19P | AATGATGGCAATGGCAGACTAAACACTTGCTTTTCTTTTGCTGC        |
| F <sub>M</sub> /L23P | TCTTGCCATCACCATTAAATTATGTTTCATCCCGAGCACCTT          |
| R <sub>M</sub> /L23P | AATTAATGGTGATGGCAAGAGCAGACTAAGCAGCAAAAGAA           |
| F <sub>M</sub> /L42Q | AAGCACAGAACCTTCGTAAAACGCTGCTCATGGCGTCTT             |
| R <sub>M</sub> /L42Q | TTTACGAAGGTTCTGTGCTTTCCATGAGCTTACAGGTCTCTT          |
| F <sub>M</sub> /N43S | CTTAGTCTTCGTAAAACGCTGCTCATGGCGTCTTCGGTT             |
| R <sub>M</sub> /N43S | AGCGTTTTACGAAGACTAAGTGCTTTCCATGAGCTTACAGG           |
| F <sub>M</sub> /C61S | GCTTAAAACCTCTGAATTCTTCCCGGTTACCGTGCGTT              |
| R <sub>M</sub> /C61S | AGAATTCAGAGGTTTTAAGCGAACCGAAGACGCCATGA              |
| F <sub>M</sub> /C66S | ATTGTTCCCGGTTACCGTCTGTTTACGCCCAAGAAACATT            |
| R <sub>M</sub> /C66S | AGACGGTAACCGGGAACAATTCAGAGGTTTTAAGCGAACC            |
| F <sub>M</sub> /A69K | GCGTTTACAAGCAAGAAACATTAACATTCTTACTGACGCAGAAG        |
| R <sub>M</sub> /A69K | TGTTTCTTGCTTGTAACGCACGGTAACCGGGAACAATT              |
| F <sub>M</sub> /L73K | GAAACAAAGACATTCTTACTGACGCAGAAGAAGACCTGCGT           |
| R <sub>M</sub> /L73K | AGTAAGAATGTCTTTGTTTCTTGGGCGTAAACGCACGGTA            |
| F <sub>M</sub> /C83S | ACCTCTGTGAAGAATTATGTCCAGAAAGAGCACCACCAC             |
| R <sub>M</sub> /C83S | ACATAATTCTTCACAGAGGTCTTCTTCTGCGTCAGTAAGAATG         |
